# Supplementary material
Source: publisher site journal article supplement (https://www.spandidos-publications.com/8621/downloadSupplementary)
Supplement: Supplementary file 1 [file downloadSupplementary]

Table SI. Sequences of miR-195-5p mimics, inhibitors and negative controls used for transfection.

| Name                 | Sequence (5'-3')                                                         |
|----------------------|--------------------------------------------------------------------------|
| miR-195-5p inhibitor | GCCAAUAUUUCUGUGCUGCUA                                                    |
| NC inhibitor         | CAGUACUUUUGUGUAGUACAA                                                    |
| miR-195-5p mimics    | Sense: UAGCAGCACAGAAAUAUUGGC<br>Antisense: CAAUAUUUCUGUGCUGCUAUU         |
| NC mimics            | Sense: UCACAACCUCCUAGAAAGAGUAGA<br>Antisense: CAGUACUUUUGUGUAGUACAA      |
| si-IGF2BP3           | SS sequence: CACUCUUCACAAUGAACAAAC<br>AS sequence: UUGUUCAUUGUGAAGAGUGGU |
| si-NC                | SS sequence: UCUCACUCAUGACAAAACACA<br>AS sequence: UUCGGUUUGAGUAUUAAGGUG |

si-, small interfering; NC, negative control; miR, microRNA; IGF2BP3, insulin-like growth factor 2 mRNA-binding protein 3.
